# Supplementary material for: BMI in childhood and adolescence is associated with impaired reproductive function—a population-based cohort study from birth to age 50 years
Source: PubMed Central journal article supplement (PMC8643422; doi:10.1093/humrep/deab164), 2021-08-07
Supplement: deab164_supplementary_table_s1.pdf [file deab164_supplementary_table_s1.pdf]

**Supplementary Table S1** Distribution of BMI in infancy and early childhood.

| <b>BMI</b>       | <b>6 months</b> | <b>12 months</b> | <b>24 months</b> | <b>3 years</b> | <b>4 years</b> | <b>5 years</b> | <b>6 years</b> |
|------------------|-----------------|------------------|------------------|----------------|----------------|----------------|----------------|
| Below 5th pc (%) | 2.3             | 0.8              | 1.0              | 1.3            | 1.3            | 2.2            | 2.9            |
| 5th–85th pc (%)  | 73.0            | 57.7             | 68.1             | 76.1           | 85.4           | 87.1           | 84.7           |
| 85th–95th pc (%) | 15.4            | 21.4             | 17.0             | 14.1           | 8.0            | 6.2            | 8.2            |
| Over 95th pc (%) | 9.3             | 20.1             | 13.9             | 8.6            | 5.2            | 4.5            | 4.2            |
| Total number     | 2928            | 3797             | 1773             | 1633           | 1553           | 1428           | 1888           |

Classification has been made according to the World Health Organization (WHO) criteria (Center for Disease Control and Prevention, National Center for Health Statistics). Women who reported to have never attempted to achieve pregnancy were excluded from all analyses.  
pc, percentile.
