# Supplementary material for: BMI in childhood and adolescence is associated with impaired reproductive function—a population-based cohort study from birth to age 50 years
Source: PubMed Central journal article supplement (PMC8643422; doi:10.1093/humrep/deab164), 2021-08-07
Supplement: deab164_supplementary_table_s2.pdf [file deab164_supplementary_table_s2.pdf]

**Supplementary Table SII Association between infancy underweight (BMI under 5th percentile (pc)) and ‘obesity’ (BMI over 95th (pc)) at ages 6 and 12 months and fertility outcomes compared to normal weight group (5th–95th pc).**

|               |                  | No infertility problems | Decreased fecundability at age 31 years | Infertility assessments before age 46 years | Infertility treatments before age 46 years | Childlessness at age 50 years |
|---------------|------------------|-------------------------|-----------------------------------------|---------------------------------------------|--------------------------------------------|-------------------------------|
| Age 6 months  | Total number     | 1588                    | 241                                     | 383                                         | 294                                        | 397                           |
| BMI < 5th pc  | Prevalence (%)   | 2.0                     | 2.1                                     | 2.1                                         | 2.7                                        | 3.3                           |
|               | OR (CI95%) Crude | ref                     | 1.08 (0.42–2.81)                        | 1.12 (0.51–2.47)                            | 1.49 (0.68–3.27)                           | 1.54 (0.77–3.11)              |
|               | Model I          | ref                     | 1.08 (0.42–2.81)                        | 1.12 (0.51–2.48)                            | 1.43 (0.67–3.30)                           | 1.39(0.68–3.02)               |
|               | Model II         | ref                     | 1.08 (0.41–2.86)                        | 1.15 (0.52–2.57)                            | 1.53 (0.68–3.43)                           | 1.35 (0.63–2.92)              |
| BMI > 95th pc | Prevalence (%)   | 8.7                     | 10.0                                    | 11.0                                        | 10.9                                       | 8.1                           |
|               | OR (CI95%) Crude | ref                     | 1.16 (0.73–1.85)                        | 1.15(0.77–1.70)                             | 1.17 (0.75–1.81)                           | 0.92 (0.60–1.40)              |
|               | Model I          | ref                     | 1.14 (0.72–1.83)                        | 1.15 (0.76–1.69)                            | 1.16 (0.74–1.83)                           | 0.96 (0.61–1.45)              |
|               | Model II         | ref                     | 1.12 (0.69–1.80)                        | 1.14(0.77–1.69)                             | 1.16 (0.74–1.82)                           | 0.98 (0.62–1.55)              |
| Age 12 months | Total number     | 2067                    | 312                                     | 490                                         | 390                                        | 530                           |
| BMI < 5th pc  | Prevalence (%)   | 0.8                     | 0.6                                     | 0.6                                         | 0.3                                        | 0.8                           |
|               | OR (CI95%) Crude | ref                     | 0.87 (0.45–1.47)                        | 0.74 (0.22–2.54)                            | 0.23 (0.04–2.36)                           | 1.02 (0.78–1.31)              |
|               | Model I          | ref                     | 0.88 (0.43–1.49)                        | 0.77 (0.23–2.78)                            | 0.30 (0.04–2.40)                           | 1.00 (0.77–1.31)              |
|               | Model II         | ref                     | 0.88 (0.43–1.50)                        | 0.86 (0.25–2.96)                            | 0.36 (0.05–2.78)                           | 1.00 (0.76–1.31)              |
| BMI > 95th pc | Prevalence (%)   | 20.4                    | 17.9                                    | 17.8                                        | 18.5                                       | 19.1                          |
|               | OR (CI95%) Crude | ref                     | 0.87 (0.63–1.19)                        | 0.85 (0.65–1.11)                            | 0.89 (0.68–1.19)                           | 1.02 (0.80–1.31)              |
|               | Model I          | ref                     | 0.85 (0.61–1.18)                        | 0.84 (0.60–1.10)                            | 0.87 (0.65–1.16)                           | 1.00 (0.76–1.31)              |
|               | Model II         | ref                     | 0.81 (0.59–1.11)                        | 0.81 (0.61–1.06)                            | 0.86 (0.64–1.15)                           | 1.00 (0.76–1.30)              |

Women who reported to have never attempted to achieve pregnancy were excluded from the analyses.

Results are shown as odds ratios (OR) with 95% CI.

Model I: adjustment for marital status during reproductive period.

Model II: Model I + adjustment education and smoking at age 31 years.
