# Supplementary material for: BMI in childhood and adolescence is associated with impaired reproductive function—a population-based cohort study from birth to age 50 years
Source: PubMed Central journal article supplement (PMC8643422; doi:10.1093/humrep/deab164), 2021-08-07
Supplement: deab164_supplementary_table_s3.pdf [file deab164_supplementary_table_s3.pdf]

**Supplementary Table SIII Association between age and BMI at adiposity peak/rebound and between weight classes in different age groups and fertility outcomes.**

|                                    |          | Decreased fecund-<br>ability at age 31 years | Infertility assess-<br>ments before age 46<br>years | Infertility treatments<br>before age 46 years | Childlessness at age 50 years |
|------------------------------------|----------|----------------------------------------------|-----------------------------------------------------|-----------------------------------------------|-------------------------------|
| <b>Adiposity peak OR 95% CI</b>    |          |                                              |                                                     |                                               |                               |
| Age (years)                        | Crude    | 0.88 (0.57–1.36)                             | 0.86 (0.59–1.24)                                    | 0.91 (0.61–1.36)                              | 1.01 (0.73–1.39)              |
|                                    | Model I  | 0.89 (0.58–1.37)                             | 0.86 (0.59–1.24)                                    | 0.91 (0.61–1.36)                              | 1.00 (0.70–1.42)              |
|                                    | Model II | 0.86 (0.57–1.37)                             | 0.86 (0.60–1.24)                                    | 0.91 (0.61–1.36)                              | 0.98 (0.70–1.41)              |
| BMI (kg/m <sup>2</sup> )           | Crude    | 1.08 (0.86–1.34)                             | 0.88 (0.73–1.06)                                    | 0.87 (0.71–1.08)                              | <b>0.84 (0.70–0.99)</b>       |
|                                    | Model I  | 1.08 (0.86–1.34)                             | 0.88 (0.74–1.06)                                    | 0.88 (0.71–1.08)                              | 0.83 (0.69–1.00)              |
|                                    | Model II | 1.08 (0.87–1.35)                             | 0.89 (0.74–1.07)                                    | 0.88 (0.71–1.08)                              | 0.83 (0.69–1.01)              |
| <b>Adiposity rebound OR 95% CI</b> |          |                                              |                                                     |                                               |                               |
| Age (years)                        | Crude    | 0.86 (0.72–1.04)                             | 1.06 (0.91–1.24)                                    | 1.09 (0.92–1.29)                              | 0.89 (0.76–1.02)              |
|                                    | Model I  | 0.87 (0.72–1.04)                             | 1.06 (0.91–1.24)                                    | 1.10 (0.93–1.31)                              | <b>0.86 (0.73–0.99)</b>       |
|                                    | Model II | 0.87 (0.72–1.05)                             | 1.07 (0.91–1.25)                                    | 1.09 (0.92–1.31)                              | 0.86 (0.74–1.00)              |
| BMI (kg/m <sup>2</sup> )           | Crude    | 1.10 (0.95–1.27)                             | <b>0.87 (0.76–0.99)</b>                             | 0.88 (0.76–1.01)                              | 1.01 (0.89–1.14)              |
|                                    | Model I  | 1.10 (0.95–1.27)                             | <b>0.87 (0.77–0.99)</b>                             | 0.87 (0.76–1.01)                              | 0.99 (0.87–1.13)              |
|                                    | Model II | 1.10 (0.95–1.27)                             | <b>0.87 (0.76–0.98)</b>                             | 0.88 (0.75–1.01)                              | 0.99 (0.87–1.12)              |
| <b>Age 3–6 years OR 95% CI</b>     |          |                                              |                                                     |                                               |                               |
| Underweight                        | Crude    | 1.12 (0.50–2.51)                             | 1.45 (0.81–2.62)                                    | 1.39 (0.71–2.70)                              | 1.23 (0.67–2.25)              |
|                                    | Model I  | 1.10 (0.49–2.47)                             | 1.42 (0.80–2.59)                                    | 1.36 (0.69–2.65)                              | 1.55 (0.83–2.89)              |
|                                    | Model II | 1.16 (0.51–2.61)                             | 1.48 (0.81–2.64)                                    | 1.39 (0.71–2.72)                              | 1.59 (0.85–2.98)              |
| Overweight                         | Crude    | 0.99 (0.64–1.52)                             | 0.84 (0.58–1.21)                                    | 0.83 (0.55–1.26)                              | 0.83 (0.55–1.26)              |
|                                    | Model I  | 0.98 (0.64–1.52)                             | 0.84 (0.58–1.21)                                    | 0.83 (0.55–1.25)                              | 0.83 (0.55–1.25)              |
|                                    | Model II | 0.99 (0.64–1.53)                             | 0.84 (0.58–1.22)                                    | 0.83 (0.55–1.26)                              | 0.83 (0.55–1.26)              |
| Obese                              | Crude    | 1.25 (0.73–2.41)                             | 0.65 (0.38–1.14)                                    | 0.67 (0.37–1.25)                              | 0.82 (0.50–1.34)              |
|                                    | Model I  | 1.23 (0.72–2.12)                             | 0.65 (0.37–1.13)                                    | 0.67 (0.36–1.24)                              | 0.74 (0.43–1.26)              |
|                                    | Model II | 1.24 (0.72–2.13)                             | 0.64 (0.36–1.11)                                    | 0.66 (0.35–1.22)                              | 0.74 (0.43–1.25)              |
| <b>Age 7–10 years OR 95% CI</b>    |          |                                              |                                                     |                                               |                               |
| Underweight                        | Crude    | 0.86 (0.44–1.69)                             | 1.37 (0.86–2.16)                                    | 1.31 (0.79–2.18)                              | 1.03 (0.63–1.68)              |
|                                    | Model I  | 0.86 (0.44–1.69)                             | 1.35 (0.86–2.14)                                    | 1.30 (0.78–2.16)                              | 1.00 (0.69–1.70)              |
|                                    | Model II | 0.84 (0.46–1.65)                             | 1.37 (0.87–2.18)                                    | 1.31 (0.78–2.18)                              | 1.00 (0.59–1.71)              |
| Overweight                         | Crude    | 1.28 (0.81–2.05)                             | 1.13 (0.77–1.67)                                    | 1.10 (0.71–1.68)                              | 1.23 (0.85–1.78)              |
|                                    | Model I  | 1.28 (0.80–2.04)                             | 1.12 (0.76–1.65)                                    | 1.07 (0.70–1.65)                              | 1.35 (0.91–2.00)              |
|                                    | Model II | 1.28 (0.80–2.04)                             | 1.11 (0.75–1.64)                                    | 1.08 (0.70–1.66)                              | 1.31 (0.88–1.94)              |
| Obese                              | Crude    | <b>1.88 (1.08–3.27)</b>                      | 0.71 (0.37–1.35)                                    | 0.73 (0.36–1.47)                              | 1.18 (0.70–1.98)              |
|                                    | Model I  | <b>1.87 (1.07–3.24)</b>                      | 0.70 (0.37–1.35)                                    | 0.71 (0.35–1.44)                              | 1.00 (0.56–1.77)              |
|                                    | Model II | <b>1.86 (1.07–3.28)</b>                      | 0.71 (0.37–1.35)                                    | 0.73 (0.36–1.47)                              | 0.99 (0.56–1.77)              |
| <b>Age 11–15 years OR 95% CI</b>   |          |                                              |                                                     |                                               |                               |
| Underweight                        | Crude    | 0.92 (0.53–1.58)                             | 1.42 (0.97–2.09)                                    | <b>1.54 (1.02–2.33)</b>                       | 1.14 (0.76–1.71)              |
|                                    | Model I  | 0.92 (0.53–1.58)                             | 1.42 (0.97–2.09)                                    | <b>1.55 (1.02–2.34)</b>                       | 1.25 (0.82–1.93)              |
|                                    | Model II | 0.89 (0.51–1.53)                             | 1.43 (0.97–2.10)                                    | <b>1.55 (1.02–2.36)</b>                       | 1.27 (0.82–1.95)              |
| Overweight                         | Crude    | 1.16 (0.74–1.82)                             | 0.87 (0.58–1.31)                                    | 0.93 (0.60–1.46)                              | 1.68 (0.96–1.96)              |
|                                    | Model I  | 1.16 (0.74–1.83)                             | 0.86 (0.57–1.32)                                    | 0.91 (0.58–1.42)                              | <b>1.57 (1.08–2.29)</b>       |

(continued)

### Supplementary Table SIII Continued

|       |          | Decreased fecund-<br>ability at age 31 years | Infertility assess-<br>ments before age 46<br>years | Infertility treatments<br>before age 46 years | Childlessness at age 50 years |
|-------|----------|----------------------------------------------|-----------------------------------------------------|-----------------------------------------------|-------------------------------|
| Obese | Model II | 1.04 (0.63–1.73)                             | 0.86 (0.57–1.30)                                    | 0.94 (0.59–1.45)                              | <b>1.56 (1.06–2.27)</b>       |
|       | Crude    | 1.78 (0.97–3.23)                             | 1.21 (0.68–2.16)                                    | 1.13 (0.59–2.18)                              | <b>1.68 (1.01–2.79)</b>       |
|       | Model I  | 1.75 (0.97–3.21)                             | 1.21 (0.68–2.15)                                    | 1.11 (0.57–2.14)                              | <b>1.77 (1.02–3.01)</b>       |
|       | Model II | 1.82 (0.99–3.33)                             | 1.22 (0.68–2.18)                                    | 1.16 (0.60–2.24)                              | <b>1.77 (1.02–3.07)</b>       |

Normal weight is used as a reference group.

Women with polycystic ovary syndrome were excluded. Women who reported to have never attempted to achieve pregnant were excluded from the analyses.

Underweight (BMI <5th percentile (pc)), normal weight (BMI 5th–85th pc), overweight (BMI 85th–95th pc), obese (BMI >95th pc).

Results are shown as OR with 95% CI.

Model I: adjustment for marital status during reproductive period.

Model II: Model I + adjustment for education and smoking.

The bold values significance is expressed in the Tables as ORs.
